# Supplementary material
Source: Springer Nature journal article supplement (https://www.springermedizin.de/resource/supplementary/12985_2009_750_MOESM1_ESM.pdf/9609206)

$\alpha 2,3SA$ -gal receptors

$\alpha 2,6SA$ -gal receptors

chickens

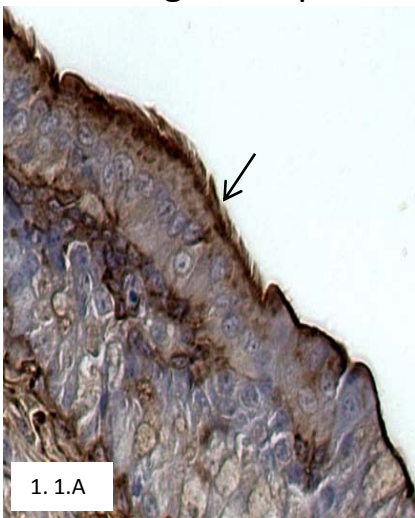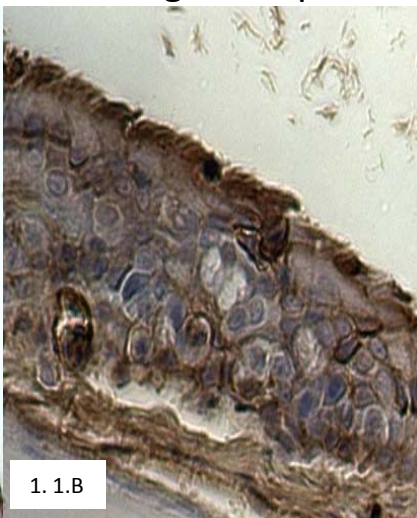

ducks

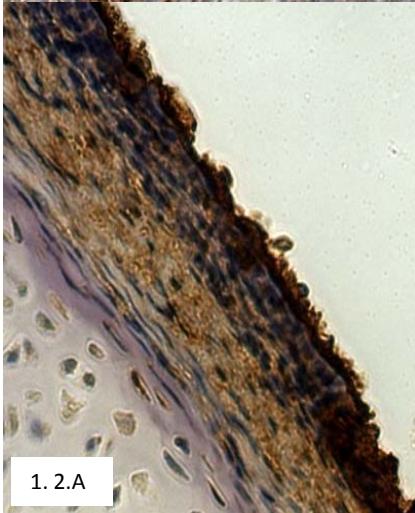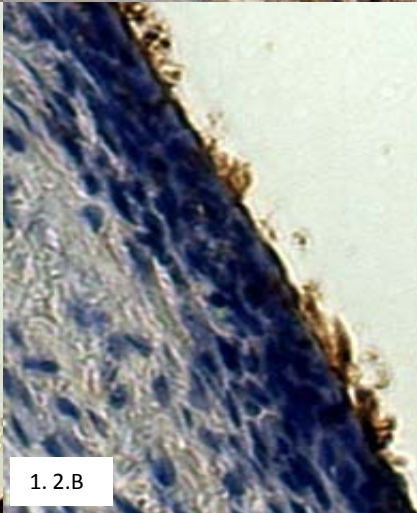

turkeys

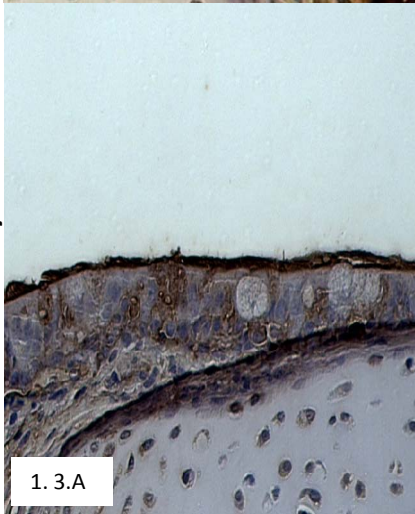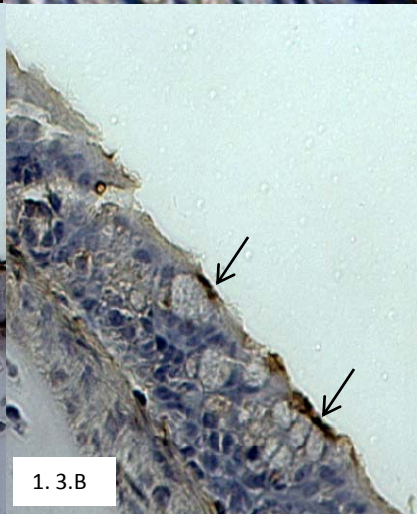

Supplement: MOESM1 [file 9609206]
